# Supplementary material for: Green synthesis of silver nanoparticles using Vernonia amygdalina plant extract and its antimicrobial activities
Source: PubMed Central journal article supplement — Heliyon. 2023 Jun 15;9(6):e17356. doi: 10.1016/j.heliyon.2023.e17356 (PMC10293723; doi:10.1016/j.heliyon.2023.e17356), 2023-06-15

# Size Distribution Report by Intensity

v2.2

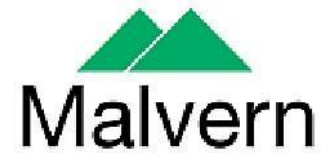

## Sample Details

Sample Name: AgNPs

SOP Name: CNC.sop

General Notes:

File Name: Va-AgNPs dts

Dispersant Name: Water

Record Number: 273

Dispersant RI: 1.330

Material RI: 1.59

Viscosity (cP): 0.8872

Material Absorbtion: 0.010

Measurement Date and Time: Tuesday, Dec 09, 2021...

## System

Temperature (°C): 25.0

Duration Used (s): 270

Count Rate (kcps): 22.0

Measurement Position (mm): 0.85

Cell Description: 22.0

Disposable sizing cu /ette

Attenuator: 11

## Results

|                                                 | Size (d.nm):         | % Intensity: | St Dev (d.n...) |
|-------------------------------------------------|----------------------|--------------|-----------------|
| <b>Z-Average (d.nm): 565</b>                    | 56.45                | 66.5         | 5.353           |
| <b>Pdl: 0.7</b>                                 | <b>Peak 1:</b> 3.05  | 33.5         | 0.1890          |
| <b>Intercept: 0.487</b>                         | <b>Peak 2:</b> 0.000 | 0.0          | 0.000           |
| <b>Result quality : Refer to quality report</b> | <b>Peak 3:</b>       |              |                 |

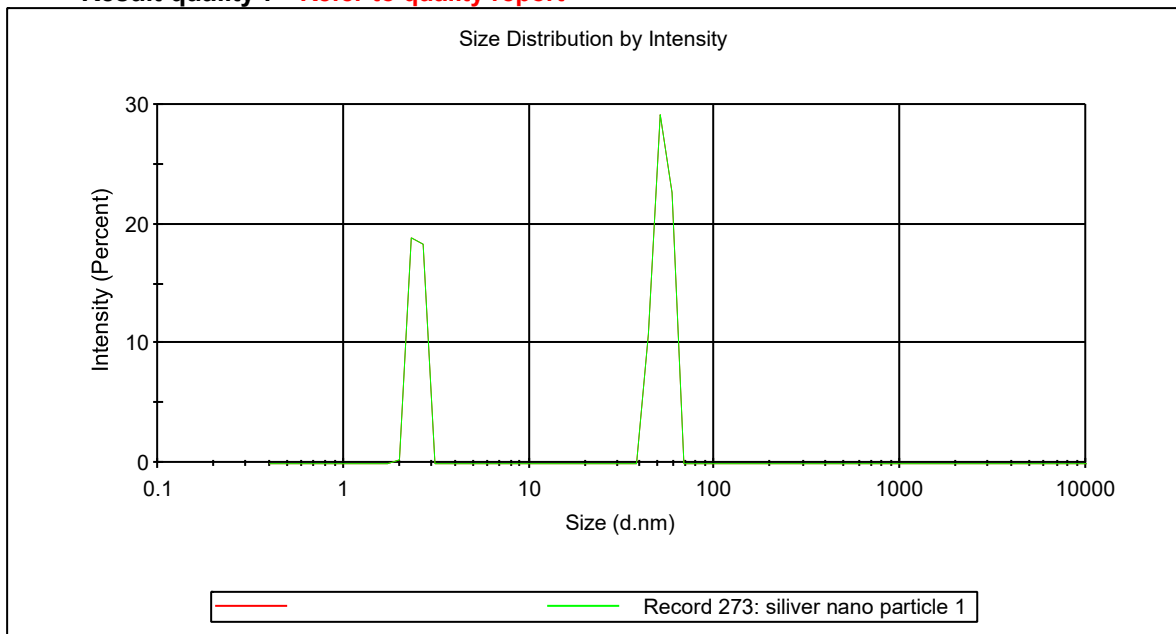

Supplement: mmc1.pdf [file mmc1.pdf]
